# Supplementary material for: Transcriptomic signatures in whole blood of patients who acquire a chronic inflammatory response syndrome (CIRS) following an exposure to the marine toxin ciguatoxin
Source: PubMed Central journal article supplement (PMC4392619; doi:10.1186/s12920-015-0089-x), 2015-04-02

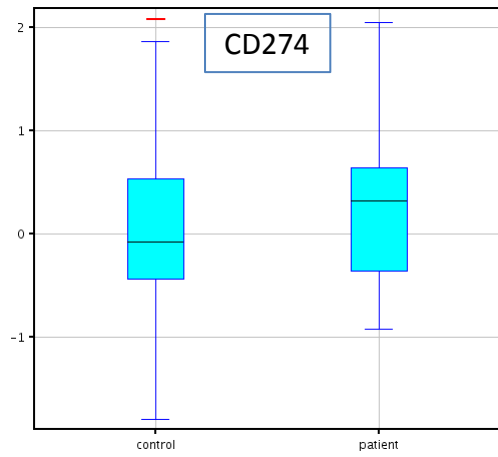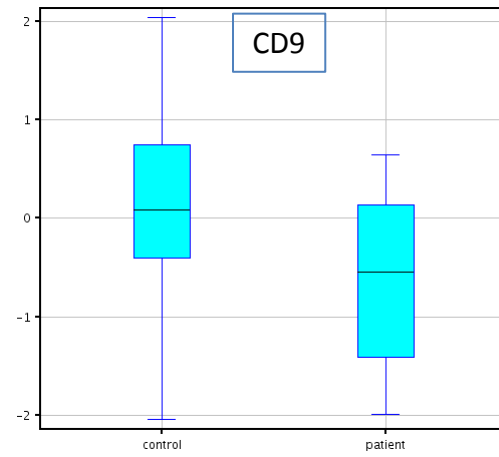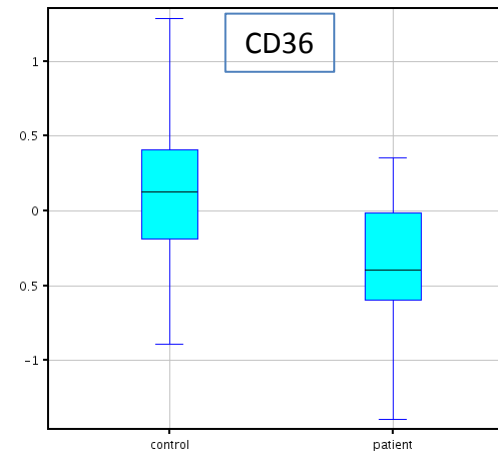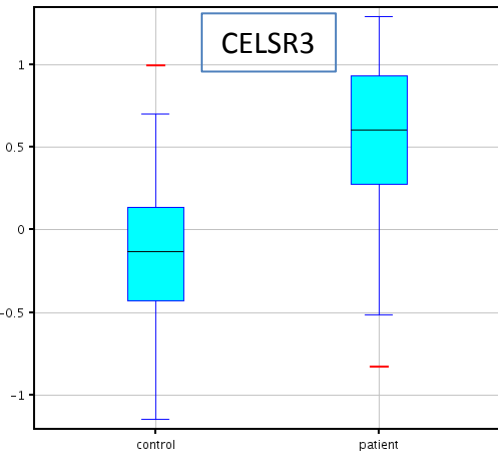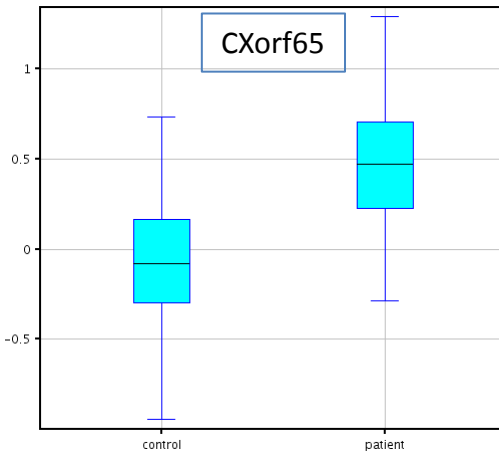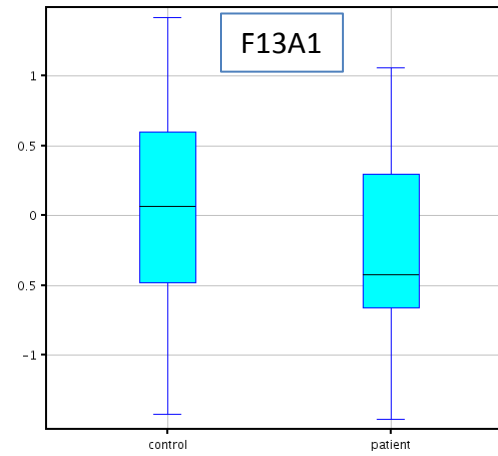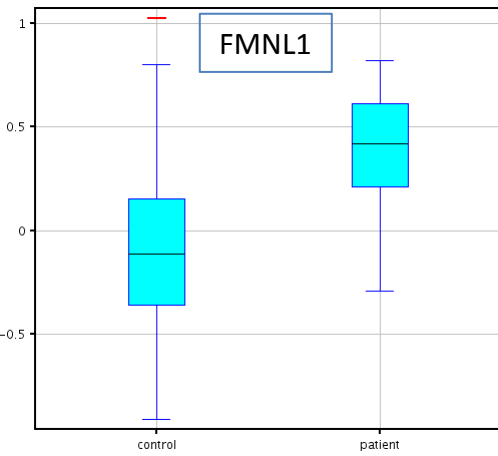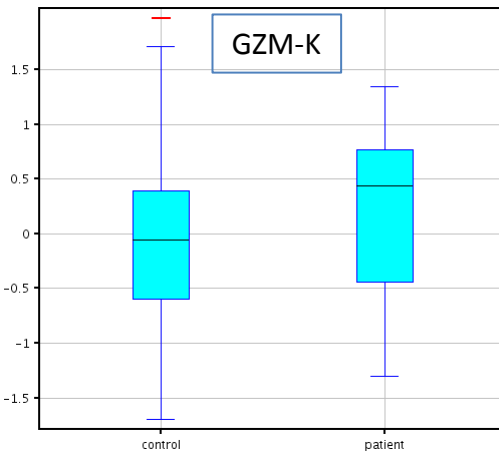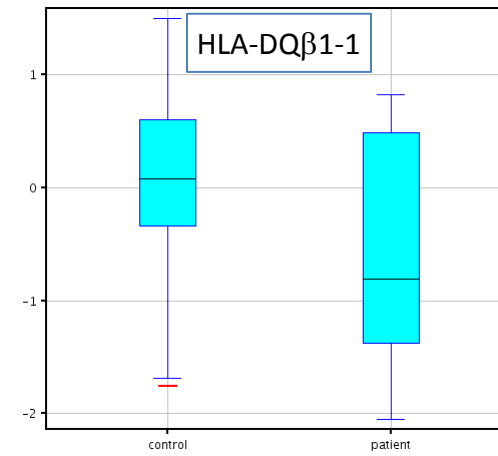

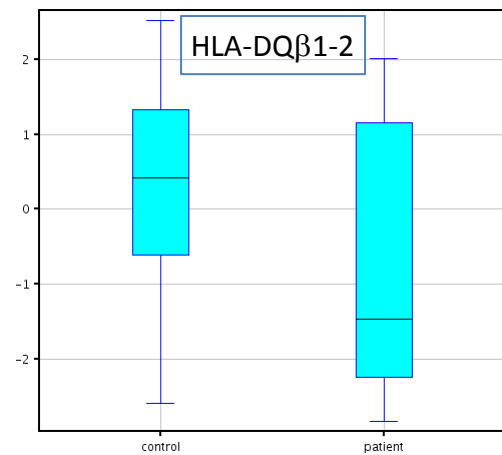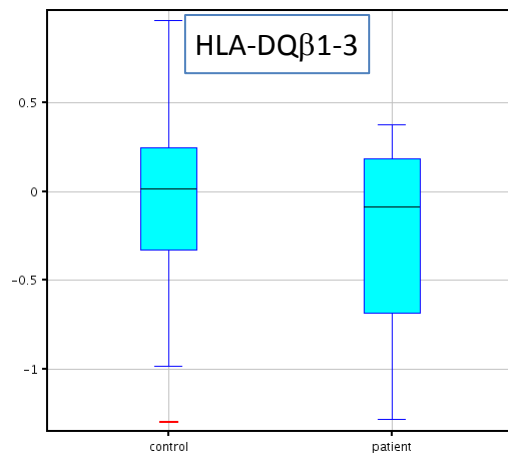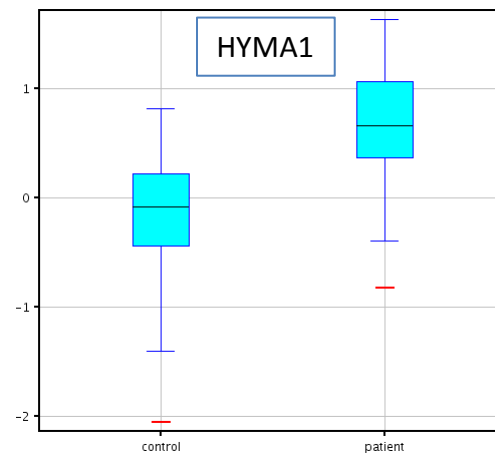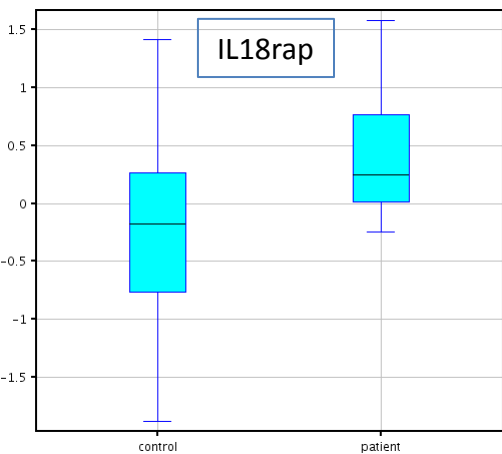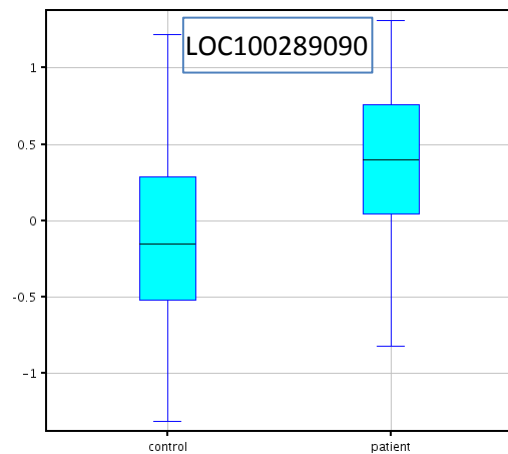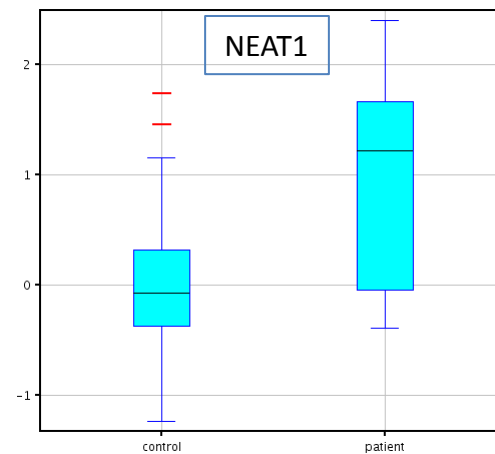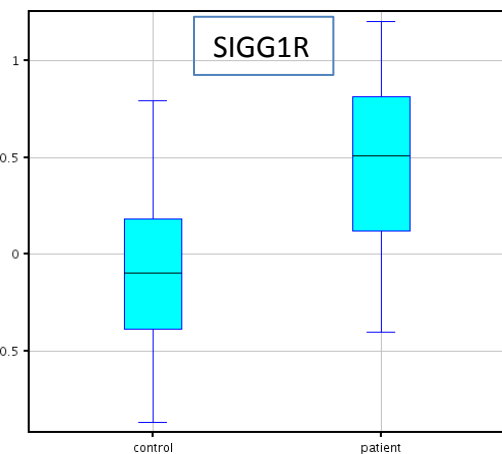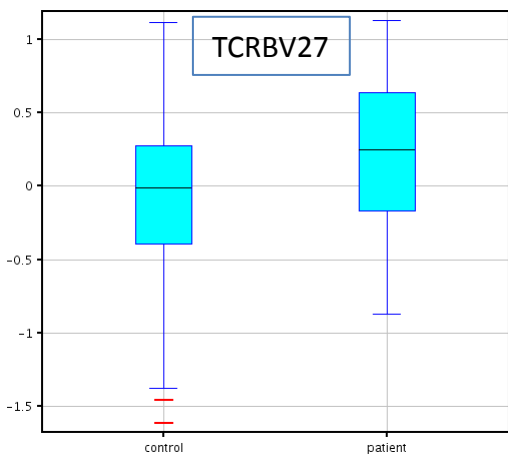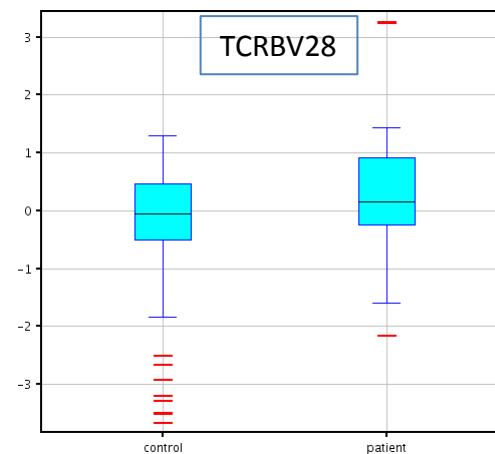

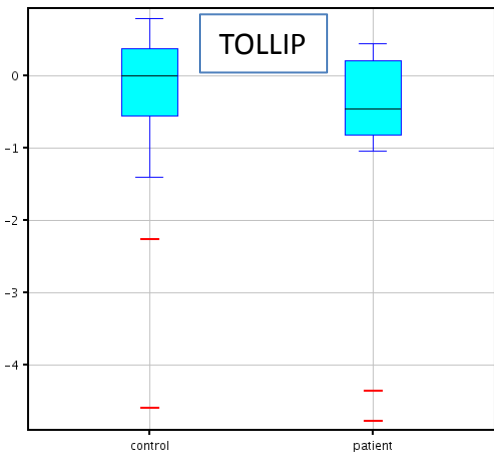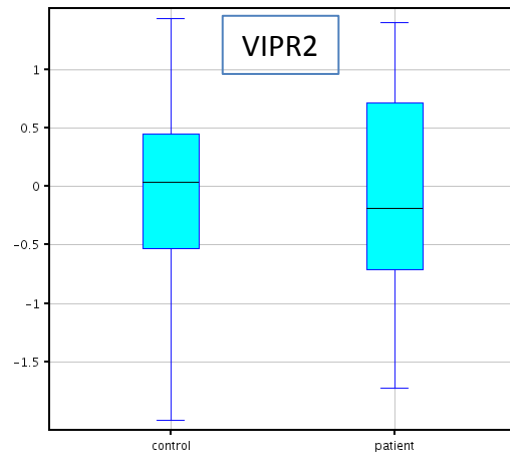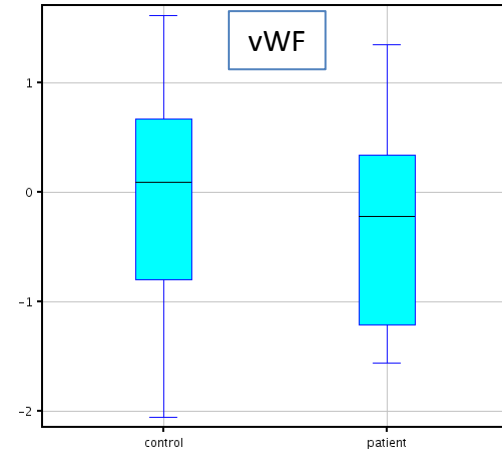

Supplement: 12920_2015_89_MOESM4_ESM.pdf [file 12920_2015_89_MOESM4_ESM.pdf]
