# Supplementary material for: Transcriptomic signatures in whole blood of patients who acquire a chronic inflammatory response syndrome (CIRS) following an exposure to the marine toxin ciguatoxin
Source: PubMed Central journal article supplement (PMC4392619; doi:10.1186/s12920-015-0089-x), 2015-04-02
Supplement: 12920_2015_89_MOESM1_ESM.pdf [file 12920_2015_89_MOESM1_ESM.pdf]

| Site of acquisition | Duration | Species implicated                   |
|---------------------|----------|--------------------------------------|
| China               | 1 year   | 3 different species in a single meal |
| St. John            | 1 year   | Barracuda                            |
| Yucatan             | 3 years  | Snapper                              |
| Fiji                | 3 years  | Barracuda                            |
| Fiji                | 3 years  | Barracuda                            |
| Hawaii              | 4 years  | Roi (peacock grouper)                |
| Caribbean           | 4 years  | Grouper                              |
| Caribbean           | 5 years  | Grouper                              |
| Caribbean           | 6 years  | Grouper                              |
| Panama              | 7 years  | Jack                                 |
| Miami               | 8 years  | Jack                                 |

**Supplementary table 1. Acquisition, duration and fish species.** Geographic location of exposure, duration of illness at time of sampling and fish consumed in cases of ciguatera CIRS
