# Supplementary material for: Transcriptomic signatures in whole blood of patients who acquire a chronic inflammatory response syndrome (CIRS) following an exposure to the marine toxin ciguatoxin
Source: PubMed Central journal article supplement (PMC4392619; doi:10.1186/s12920-015-0089-x), 2015-04-02
Supplement: 12920_2015_89_MOESM2_ESM.pdf [file 12920_2015_89_MOESM2_ESM.pdf]

| Category                 | Pre-exposure | Acute | Chronic |
|--------------------------|--------------|-------|---------|
| Fatigue                  | 2            | 6     | 10      |
| Weakness                 | 1            | 5     | 11      |
| Ache                     | 2            | 4     | 9       |
| Cramp                    | 0            | 3     | 8       |
| Unusual pain             | 0            | 2     | 6       |
| Ice pick pain            | 0            | 1     | 4       |
| Headache                 | 1            | 6     | 7       |
| Light sensitivity        | 0            | 3     | 10      |
| Red eyes                 | 1            | 2     | 8       |
| Blurred vision           | 0            | 2     | 9       |
| Tearing                  | 0            | 2     | 3       |
| Sinus                    | 1            | 2     | 6       |
| Cough                    | 0            | 0     | 1       |
| Shortness of breath      | 0            | 2     | 7       |
| Abdominal pain           | 1            | 8     | 8       |
| Diarrhea                 | 1            | 10    | 7       |
| Joint Pain               | 1            | 2     | 7       |
| Morning stiffness        | 0            | 2     | 6       |
| Memory                   | 0            | 5     | 10      |
| Focus/concentration      | 0            | 5     | 11      |
| Word recall              | 0            | 4     | 10      |
| Information assimilation | 0            | 4     | 10      |
| Confusion                | 0            | 3     | 10      |
| Disorientation           | 0            | 3     | 6       |
| Itching                  | 0            | 5     | 8       |
| Mood swings              | 0            | 2     | 9       |
| Appetite                 | 0            | 0     | 6       |
| Sweats                   | 0            | 8     | 4       |
| Temp regulation          | 0            | 3     | 8       |
| Thirst                   | 0            | 0     | 5       |
| Increased urination      | 0            | 2     | 8       |
| Static shocks            | 0            | 0     | 2       |
| Numbness                 | 0            | 4     | 9       |
| Tingling                 | 0            | 6     | 9       |
| Vertigo                  | 0            | 4     | 6       |
| Metallic taste           | 1            | 6     | 6       |
| Tremor                   | 0            | 4     | 8       |
| Hot/cold reversal        | 0            | 8     | 4       |

**Supplementary Table 2. Symptoms.** Number and type of symptoms reported by 11 ciguatera fish poisoning patients prior to, and during, acute and chronic phases of exposure.
