# Supplementary material for: Transcriptomic signatures in whole blood of patients who acquire a chronic inflammatory response syndrome (CIRS) following an exposure to the marine toxin ciguatoxin
Source: PubMed Central journal article supplement (PMC4392619; doi:10.1186/s12920-015-0089-x), 2015-04-02
Supplement: 12920_2015_89_MOESM3_ESM.pdf [file 12920_2015_89_MOESM3_ESM.pdf]

| Agilent Probe | p value  | FC    | GeneSymbol   | Description                                                                                                       | GenbankAccession | EntrezGeneID |
|---------------|----------|-------|--------------|-------------------------------------------------------------------------------------------------------------------|------------------|--------------|
| A_23_P49924   | 4.58E-03 | 1.43  | NT5C3B       | 5'-nucleotidase, cytosolic IIIB (NT5C3B), transcript variant 1, mRNA [NM_052935]                                  | NM_052935        | 115024       |
| A_23_P148194  | 3.70E-05 | -1.41 | ADI1         | acireductone dioxygenase 1 (ADI1), mRNA [NM_018269]                                                               | NM_018269        | 55256        |
| A_23_P337262  | 5.53E-03 | -1.61 | APCDD1       | adenomatosis polyposis coli down-regulated 1 (APCDD1), mRNA [NM_153000]                                           | NM_153000        | 147495       |
| A_23_P137931  | 1.09E-02 | -1.44 | ADORA3       | adenosine A3 receptor (ADORA3), transcript variant 2, mRNA [NM_000677]                                            | NM_000677        | 140          |
| A_33_P3396010 | 8.58E-04 | 1.49  | AGER         | advanced glycosylation end product-specific receptor (AGER), transcript variant 9, mRNA [NM_001206966]            | NM_001206966     | 177          |
| A_23_P157299  | 2.02E-04 | 1.63  | AEBP1        | AE binding protein 1 (AEBP1), mRNA [NM_001129]                                                                    | NM_001129        | 165          |
| A_33_P3380311 | 3.96E-02 | 1.50  | ATRX         | alpha thalassemia/mental retardation syndrome X-linked (ATRX), transcript variant 1, mRNA [NM_000489]             | NM_000489        | 546          |
| A_24_P174503  | 2.41E-04 | 1.45  | AMT          | aminomethyltransferase (AMT), transcript variant 1, mRNA [NM_000481]                                              | NM_000481        | 275          |
| A_33_P3245449 | 1.98E-02 | -1.63 | LOC389834    | ankyrin repeat domain 57 pseudogene (LOC389834), non-coding RNA [NR_027420]                                       | NR_027420        | 389834       |
| A_33_P3263666 | 1.42E-02 | -1.50 | ANKRD9       | ankyrin repeat domain 9 (ANKRD9), mRNA [NM_152326]                                                                | NM_152326        | 122416       |
| A_32_P148345  | 2.97E-02 | -1.49 | ANXA2        | annexin A2 (ANXA2), transcript variant 2, mRNA [NM_001002857]                                                     | NM_001002857     | 302          |
| A_24_P323114  | 3.56E-03 | -1.43 | ANXA2P3      | annexin A2 pseudogene 3 (ANXA2P3), non-coding RNA [NR_001446]                                                     | NR_001446        | 305          |
| A_24_P8109    | 5.72E-04 | 1.41  | ANO9         | anoctamin 9 (ANO9), mRNA [NM_001012302]                                                                           | NM_001012302     | 338440       |
| A_23_P55373   | 2.62E-02 | -1.58 | ALOX15       | arachidonate 15-lipoxygenase (ALOX15), mRNA [NM_001140]                                                           | NM_001140        | 246          |
| A_33_P3211864 | 1.75E-03 | 1.42  | ARMCX4       | armadillo repeat containing, X-linked 4 (ARMCX4), transcript variant 2, non-coding RNA [NR_028407]                | NR_028407        | 100131755    |
| A_23_P146325  | 4.81E-02 | 1.41  | ASAP1-IT1    | ASAP1 intronic transcript 1 (non-protein coding) (ASAP1-IT1), long non-coding RNA [NR_002765]                     | NR_002765        | 29065        |
| A_23_P98686   | 3.36E-04 | 1.56  | ATHL1        | ATH1, acid trehalase-like 1 (yeast) (ATHL1), mRNA [NM_025092]                                                     | NM_025092        | 80162        |
| A_33_P3332414 | 1.47E-03 | 1.52  | ABCB1        | ATP-binding cassette, sub-family B (MDR/TAP), member 1 (ABCB1), mRNA [NM_000927]                                  | NM_000927        | 5243         |
| A_23_P379034  | 2.19E-05 | 1.45  | BAIAP2L2     | BAI1-associated protein 2-like 2 (BAIAP2L2), mRNA [NM_025045]                                                     | NM_025045        | 80115        |
| A_23_P71946   | 2.19E-04 | 1.50  | BSPRY        | B-box and SPRY domain containing (BSPRY), mRNA [NM_017688]                                                        | NM_017688        | 54836        |
| A_24_P113131  | 7.04E-03 | 1.45  | BZRAP1       | benzodiazapine receptor (peripheral) associated protein 1 (BZRAP1), transcript variant 1, mRNA [NM_004758]        | NM_004758        | 9256         |
| A_23_P92093   | 2.91E-05 | 1.62  | CELSR3       | cadherin, EGF LAG seven-pass G-type receptor 3 (CELSR3), mRNA [NM_001407]                                         | NM_001407        | 1951         |
| A_33_P3228612 | 1.32E-02 | 1.44  | CACNA1E      | calcium channel, voltage-dependent, R type, alpha 1E subunit (CACNA1E), transcript variant 1, mRNA [NM_001205293] | NM_001205293     | 777          |
| A_33_P3218960 | 7.19E-04 | 1.44  | CACNA1H      | calcium channel, voltage-dependent, T type, alpha 1H subunit (CACNA1H), transcript variant 1, mRNA [NM_021098]    | NM_021098        | 8912         |
| A_23_P83838   | 4.94E-02 | 1.40  | CA8          | carbonic anhydrase VIII (CA8), mRNA [NM_004056]                                                                   | NM_004056        | 767          |
| A_23_P104563  | 2.73E-03 | -1.42 | CPT1A        | carnitine palmitoyltransferase 1A (liver) (CPT1A), transcript variant 2, mRNA [NM_001031847]                      | NM_001031847     | 1374         |
| A_23_P338479  | 1.34E-03 | 1.62  | CD274        | CD274 molecule (CD274), transcript variant 1, mRNA [NM_014143]                                                    | NM_014143        | 29126        |
| A_23_P111583  | 7.44E-05 | -1.56 | CD36         | CD36 molecule (thrombospondin receptor) (CD36), transcript variant 2, mRNA [NM_001001547]                         | NM_001001547     | 948          |
| A_23_P76364   | 4.01E-04 | -1.90 | CD9          | CD9 molecule (CD9), mRNA [NM_001769]                                                                              | NM_001769        | 928          |
| A_32_P170397  | 9.33E-05 | 1.51  | LOC100289090 | cDNA FLJ33063 fis, clone TRACH2000047. [AK057625]                                                                 | AK057625         | 100289090    |
| A_33_P3589543 | 3.24E-04 | 1.60  | LOC692247    | cDNA FLJ36520 fis, clone TRACH2002100. [AK093839]                                                                 | AK093839         | 692247       |
| A_33_P3362737 | 2.58E-02 | -1.59 |              | cDNA FLJ42705 fis, clone BRAMY3006297. [AK124695]                                                                 | AK124695         |              |
| A_23_P12082   | 4.12E-03 | 1.49  | CHI3L2       | chitinase 3-like 2 (CHI3L2), transcript variant 3, mRNA [NM_001025199]                                            | NM_001025199     | 1117         |
| A_23_P430792  | 4.36E-03 | 1.51  | C17orf66     | chromosome 17 open reading frame 66 (C17orf66), mRNA [NM_152781]                                                  | NM_152781        | 256957       |
| A_33_P3212799 | 1.65E-03 | 1.43  | C22orf34     | chromosome 22 open reading frame 34 (C22orf34), long non-coding RNA [NR_026997]                                   | NR_026997        | 348645       |
| A_33_P3422374 | 4.00E-06 | 1.81  | C6orf163     | chromosome 6 open reading frame 163 (C6orf163), mRNA [NM_001010868]                                               | NM_001010868     | 206412       |
| A_33_P3460043 | 2.17E-02 | -1.40 | C8orf56      | chromosome 8 open reading frame 56 (C8orf56), long non-coding RNA [NR_027071]                                     | NR_027071        | 157556       |
| A_32_P101352  | 1.45E-05 | 1.49  | CXorf65      | chromosome X open reading frame 65 (CXorf65), transcript variant 1, mRNA [NM_001025265]                           | NM_001025265     | 158830       |
| A_23_P134854  | 8.06E-03 | -1.48 | CLDN23       | claudin 23 (CLDN23), mRNA [NM_194284]                                                                             | NM_194284        | 137075       |
| A_32_P140139  | 1.14E-02 | -1.40 | F13A1        | coagulation factor XIII, A1 polypeptide (F13A1), mRNA [NM_000129]                                                 | NM_000129        | 2162         |
| A_32_P213661  | 2.92E-04 | 1.42  | CCDC122      | coiled-coil domain containing 122 (CCDC122), mRNA [NM_144974]                                                     | NM_144974        | 160857       |
| A_23_P25674   | 4.58E-04 | -1.48 | CKB          | creatine kinase, brain (CKB), mRNA [NM_001823]                                                                    | NM_001823        | 1152         |
| A_23_P2616    | 3.16E-02 | -1.46 | CLEC4C       | C-type lectin domain family 4, member C (CLEC4C), transcript variant 1, mRNA [NM_130441]                          | NM_130441        | 170482       |
| A_23_P139486  | 6.94E-05 | -1.40 | CDK2AP1      | cyclin-dependent kinase 2 associated protein 1 (CDK2AP1), transcript variant 1, mRNA [NM_004642]                  | NM_004642        | 8099         |
| A_23_P428129  | 2.97E-03 | -1.46 | CDKN1C       | cyclin-dependent kinase inhibitor 1C (p57, Kip2) (CDKN1C), transcript variant 1, mRNA [NM_000076]                 | NM_000076        | 1028         |
| A_23_P2181    | 7.42E-04 | -1.68 | CYB5R2       | cytochrome b5 reductase 2 (CYB5R2), mRNA [NM_016229]                                                              | NM_016229        | 51700        |
| A_23_P98645   | 9.00E-03 | 1.41  | DCHS1        | dachsous cadherin-related 1 (DCHS1), mRNA [NM_003737]                                                             | NM_003737        | 8642         |
| A_23_P156445  | 1.33E-03 | 2.16  | DDX43        | DEAD (Asp-Glu-Ala-Asp) box polypeptide 43 (DDX43), mRNA [NM_018665]                                               | NM_018665        | 55510        |

|               |          |       |             |                                                                                                               |              |           |
|---------------|----------|-------|-------------|---------------------------------------------------------------------------------------------------------------|--------------|-----------|
| A_23_P131139  | 4.36E-02 | -1.43 | DIRC1       | disrupted in renal carcinoma 1 (DIRC1), mRNA [NM_052952]                                                      | NM_052952    | 116093    |
| A_23_P417921  | 2.79E-02 | -1.41 | DNAJC5G     | DnaJ (Hsp40) homolog, subfamily C, member 5 gamma (DNAJC5G), mRNA [NM_173650]                                 | NM_173650    | 285126    |
| A_23_P316472  | 1.24E-04 | 1.44  | DNHD1       | dynein heavy chain domain 1 (DNHD1), transcript variant 1, mRNA [NM_144666]                                   | NM_144666    | 144132    |
| A_33_P3366073 | 1.79E-04 | 1.48  | EBPL        | emopamil binding protein-like (EBPL), transcript variant 3, non-coding RNA [NR_103802]                        | NR_103802    | 84650     |
| A_24_P215240  | 2.83E-02 | -1.47 | ENKUR       | enkurin, TRPC channel interacting protein (ENKUR), transcript variant 1, mRNA [NM_145010]                     | NM_145010    | 219670    |
| A_23_P105794  | 2.82E-03 | 1.43  | EPST11      | epithelial stromal interaction 1 (breast) (EPST11), transcript variant 2, mRNA [NM_033255]                    | NM_033255    | 94240     |
| A_33_P3270657 | 1.27E-03 | 1.46  | FAM111B     | family with sequence similarity 111, member B (FAM111B), transcript variant 1, mRNA [NM_198947]               | NM_198947    | 374393    |
| A_32_P108254  | 7.51E-03 | -1.43 | FAM20A      | family with sequence similarity 20, member A (FAM20A), transcript variant 1, mRNA [NM_017565]                 | NM_017565    | 54757     |
| A_23_P431305  | 2.97E-03 | -1.41 | FAM69B      | family with sequence similarity 69, member B (FAM69B), mRNA [NM_152421]                                       | NM_152421    | 138311    |
| A_23_P158925  | 4.71E-04 | 1.67  | GPR125      | G protein-coupled receptor 125 (GPR125), mRNA [NM_145290]                                                     | NM_145290    | 166647    |
| A_33_P3550894 | 8.75E-03 | 1.79  | GATA2       | GATA binding protein 2 (GATA2), transcript variant 1, mRNA [NM_001145661]                                     | NM_001145661 | 2624      |
| A_33_P3334895 | 4.95E-02 | -1.41 | GRIN2A      | glutamate receptor, ionotropic, N-methyl D-aspartate 2A (GRIN2A), transcript variant 3, mRNA [NM_001134408]   | NM_001134408 | 2903      |
| A_23_P115407  | 1.02E-03 | -1.44 | GSTM1       | glutathione S-transferase mu 1 (GSTM1), transcript variant 2, mRNA [NM_146421]                                | NM_146421    | 2944      |
| A_23_P217917  | 7.62E-05 | -1.48 | GSTM4       | glutathione S-transferase mu 4 (GSTM4), transcript variant 2, mRNA [NM_147148]                                | NM_147148    | 2948      |
| A_23_P7957    | 2.36E-04 | 1.41  | GNMT        | glycine N-methyltransferase (GNMT), mRNA [NM_018960]                                                          | NM_018960    | 27232     |
| A_23_P358195  | 2.79E-02 | 1.42  | GOLGA6L10   | golgin A6 family-like 10 (GOLGA6L10), mRNA [NM_001164465]                                                     | NM_001164465 | 647042    |
| A_33_P3243878 | 3.17E-04 | 1.42  | GOLGA6L4    | golgin A6 family-like 4 (GOLGA6L4), mRNA [NM_001267536]                                                       | NM_001267536 | 643707    |
| A_33_P3220025 | 1.34E-02 | 1.72  | GOLGA6L6    | golgin A6 family-like 6 (GOLGA6L6), mRNA [NM_001145004]                                                       | NM_001145004 | 727832    |
| A_24_P410516  | 3.57E-04 | 1.40  | GOLGA6L9    | golgin A6 family-like 9 (GOLGA6L9), mRNA [NM_198181]                                                          | NM_198181    | 440295    |
| A_23_P156218  | 5.97E-03 | 1.54  | GZMK        | granzyme K (granzyme 3; tryptase II) (GZMK), mRNA [NM_002104]                                                 | NM_002104    | 3003      |
| A_23_P51487   | 1.89E-02 | 1.90  | GBP3        | guanylate binding protein 3 (GBP3), mRNA [NM_018284]                                                          | NM_018284    | 2635      |
| A_23_P74290   | 3.89E-04 | 1.51  | GBP5        | guanylate binding protein 5 (GBP5), transcript variant 1, mRNA [NM_052942]                                    | NM_052942    | 115362    |
| A_33_P3308481 | 1.08E-04 | 1.58  | HYMAI       | hydattidiform mole associated and imprinted (non-protein coding) (HYMAI), long non-coding RNA [NR_002768]     | NR_002768    | 57061     |
| A_33_P3287428 | 1.74E-03 | 1.53  | LRRC37A4P   | hypothetical protein LOC652203, mRNA (cDNA clone MGC:111480 IMAGE:5581582), complete cds. [BC107850]          | BC107850     | 55073     |
| A_33_P3842551 | 3.65E-03 | 1.48  | IKZF2       | IKAROS family zinc finger 2 (Helios) (IKZF2), transcript variant 2, mRNA [NM_001079526]                       | NM_001079526 | 22807     |
| A_33_P3290403 | 2.04E-04 | -1.44 | IMPA2       | inositol(myo)-1(or 4)-monophosphatase 2 (IMPA2), mRNA [NM_014214]                                             | NM_014214    | 3613      |
| A_23_P150609  | 4.73E-02 | -1.61 | IGF2        | insulin-like growth factor 2 (somatomedin A) (IGF2), transcript variant 1, mRNA [NM_000612]                   | NM_000612    | 3481      |
| A_33_P3216232 | 1.04E-02 | -1.43 | ITGB1BP1    | integrin beta 1 binding protein 1 (ITGB1BP1), transcript variant 1, mRNA [NM_004763]                          | NM_004763    | 9270      |
| A_23_P45871   | 3.22E-02 | 1.44  | IFI44L      | interferon-induced protein 44-like (IFI44L), mRNA [NM_006820]                                                 | NM_006820    | 10964     |
| A_23_P28334   | 1.14E-02 | 1.43  | IL18RAP     | interleukin 18 receptor accessory protein (IL18RAP), mRNA [NM_003853]                                         | NM_003853    | 8807      |
| A_33_P3221960 | 2.31E-02 | 1.40  | IL18RAP     | interleukin 18 receptor accessory protein (IL18RAP), mRNA [NM_003853]                                         | NM_003853    | 8807      |
| A_33_P3328254 | 5.33E-03 | -1.69 | IL5RA       | interleukin 5 receptor, alpha (IL5RA), transcript variant 3, mRNA [NM_175725]                                 | NM_175725    | 3568      |
| A_33_P3411315 | 2.36E-02 | -1.42 | KRTAP3-3    | keratin associated protein 3-3 (KRTAP3-3), mRNA [NM_033185]                                                   | NM_033185    | 85293     |
| A_33_P3265222 | 2.43E-02 | 1.60  | KIAA1324    | KIAA1324 (KIAA1324), transcript variant 1, mRNA [NM_020775]                                                   | NM_020775    | 57535     |
| A_33_P3883985 | 3.66E-04 | 1.74  | LMF1        | lipase maturation factor 1 (LMF1), transcript variant 4, non-coding RNA [NR_036442]                           | NR_036442    | 64788     |
| A_32_P324933  | 6.55E-04 | 1.55  | LINC00282   | long intergenic non-protein coding RNA 282 (LINC00282), transcript variant 1, long non-coding RNA [NR_027047] | NR_027047    | 283521    |
| A_33_P3390177 | 4.26E-02 | -1.43 | LINC00884   | long intergenic non-protein coding RNA 884 (LINC00884), long non-coding RNA [NR_033929]                       | NR_033929    | 401106    |
| A_33_P3226395 | 1.26E-02 | 1.45  | LINC00937   | long intergenic non-protein coding RNA 937 (LINC00937), long non-coding RNA [NR_024420]                       | NR_024420    | 389634    |
| A_32_P221305  | 1.53E-02 | 1.42  | LINC00937   | long intergenic non-protein coding RNA 937 (LINC00937), long non-coding RNA [NR_024420]                       | NR_024420    | 389634    |
| A_23_P94186   | 4.20E-03 | -1.73 | LYPD2       | L(Y)6/PLAUR domain containing 2 (LYPD2), mRNA [NM_205545]                                                     | NM_205545    | 137797    |
| A_23_P101992  | 4.37E-03 | -1.63 | MARCO       | macrophage receptor with collagenous structure (MARCO), mRNA [NM_006770]                                      | NM_006770    | 8685      |
| A_33_P3424222 | 2.95E-03 | -1.61 | HLA-DQB1    | major histocompatibility complex, class II, DQ beta 1 (HLA-DQB1), transcript variant 1, mRNA [NM_002123]      | NM_002123    | 3119      |
| A_23_P136683  | 6.20E-03 | -2.16 | HLA-DQB1    | major histocompatibility complex, class II, DQ beta 1 (HLA-DQB1), transcript variant 2, mRNA [NM_001243961]   | NM_001243961 | 3119      |
| A_33_P3424217 | 8.09E-04 | -1.54 | HLA-DQB1    | major histocompatibility complex, class II, DQ beta 1 (HLA-DQB1), transcript variant 3, mRNA [NM_001243962]   | NM_001243962 | 3119      |
| A_23_P19510   | 7.06E-03 | -1.44 | HLA-DQB2    | major histocompatibility complex, class II, DQ beta 2 (HLA-DQB2), mRNA [NM_001198858]                         | NM_001198858 | 3120      |
| A_23_P116614  | 3.12E-03 | 1.45  | ME3         | malic enzyme 3, NADP(+)-dependent, mitochondrial (ME3), transcript variant 2, mRNA [NM_001014811]             | NM_001014811 | 10873     |
| A_33_P3236881 | 7.97E-03 | 1.46  | MINOS1-NBL1 | MINOS1-NBL1 readthrough (MINOS1-NBL1), transcript variant 1, mRNA [NM_001204088]                              | NM_001204088 | 100532736 |
| A_33_P3350202 | 2.52E-02 | -1.46 | MOC3        | molybdenum cofactor synthesis 3 (MOC3), mRNA [NM_014484]                                                      | NM_014484    | 27304     |
| A_33_P3281795 | 4.37E-03 | -1.47 | MGLL        | monoglyceride lipase (MGLL), transcript variant 1, mRNA [NM_007283]                                           | NM_007283    | 11343     |

|               |          |       |              |                                                                                                                      |              |           |
|---------------|----------|-------|--------------|----------------------------------------------------------------------------------------------------------------------|--------------|-----------|
| A_32_P216872  | 1.06E-03 | 1.41  | PDXDC2P      | mRNA; cDNA DKFZp686B0962 (from clone DKFZp686B0962). [BX647358]                                                      | BX647358     | 283970    |
| A_33_P3514859 | 1.10E-03 | 1.41  | LOC100506342 | mRNA; cDNA DKFZp686L14188 (from clone DKFZp686L14188). [BX538329]                                                    | BX538329     | 100506342 |
| A_23_P153616  | 3.16E-02 | -1.52 | MADCAM1      | mucosal vascular addressin cell adhesion molecule 1 (MADCAM1), transcript variant 1, mRNA [NM_130760]                | NM_130760    | 8174      |
| A_24_P926960  | 3.84E-02 | 1.42  | MEGF6        | multiple EGF-like-domains 6 (MEGF6), mRNA [NM_001409]                                                                | NM_001409    | 1953      |
| A_24_P88850   | 9.76E-04 | -1.43 | MRAS         | muscle RAS oncogene homolog (MRAS), transcript variant 1, mRNA [NM_012219]                                           | NM_012219    | 22808     |
| A_24_P134195  | 4.03E-03 | -1.41 | MYADM        | myeloid-associated differentiation marker (MYADM), transcript variant 1, mRNA [NM_001020818]                         | NM_001020818 | 91663     |
| A_23_P148737  | 1.33E-02 | 1.49  | MYBPH        | myosin binding protein H (MYBPH), mRNA [NM_004997]                                                                   | NM_004997    | 4608      |
| A_32_P475513  | 1.43E-05 | 1.46  | MYO15B       | myosin XVb pseudogene (MYO15B), non-coding RNA [NR_003587]                                                           | NR_003587    | 80022     |
| A_23_P210425  | 2.00E-02 | -1.66 | MYL9         | myosin, light chain 9, regulatory (MYL9), transcript variant 2, mRNA [NM_181526]                                     | NM_181526    | 10398     |
| A_33_P3325275 | 5.47E-03 | -1.44 | NRSN2        | neurensin 2 (NRSN2), mRNA [NM_024958]                                                                                | NM_024958    | 80023     |
| A_24_P273157  | 1.02E-04 | 1.44  | OBSCN        | obscurin, cytoskeletal calmodulin and titin-interacting RhoGEF (OBSCN), transcript variant 1, mRNA [NM_052843]       | NM_052843    | 84033     |
| A_23_P123172  | 2.41E-02 | 1.40  | OR2A9P       | olfactory receptor, family 2, subfamily A, member 9 pseudogene (OR2A9P), non-coding RNA [NR_002157]                  | NR_002157    | 441295    |
| A_33_P3319834 | 4.21E-02 | -1.82 | OR2T8        | olfactory receptor, family 2, subfamily T, member 8 (OR2T8), mRNA [NM_001005522]                                     | NM_001005522 | 343172    |
| A_23_P154849  | 4.95E-03 | -1.40 | OLIG1        | oligodendrocyte transcription factor 1 (OLIG1), mRNA [NM_138983]                                                     | NM_138983    | 116448    |
| A_33_P3215640 | 1.51E-02 | 1.44  | PI16         | peptidase inhibitor 16 (PI16), transcript variant 1, mRNA [NM_153370]                                                | NM_153370    | 221476    |
| A_33_P3358213 | 2.96E-04 | -2.13 | PADI6        | peptidyl arginine deiminase, type VI (PADI6), mRNA [NM_207421]                                                       | NM_207421    | 353238    |
| A_23_P42144   | 4.12E-05 | -2.26 | PEX6         | peroxisomal biogenesis factor 6 (PEX6), mRNA [NM_000287]                                                             | NM_000287    | 5190      |
| A_33_P3265016 | 3.69E-04 | -1.82 | PEX6         | peroxisomal biogenesis factor 6 (PEX6), mRNA [NM_000287]                                                             | NM_000287    | 5190      |
| A_23_P157736  | 2.26E-04 | -1.45 | PPAPDC3      | phosphatidic acid phosphatase type 2 domain containing 3 (PPAPDC3), mRNA [NM_032728]                                 | NM_032728    | 84814     |
| A_32_P94667   | 1.61E-02 | 1.59  | PDE4DIP      | phosphodiesterase 4D interacting protein (PDE4DIP), transcript variant 1, mRNA [NM_014644]                           | NM_014644    | 9659      |
| A_33_P3326992 | 9.37E-03 | 1.55  | PDE4DIP      | phosphodiesterase 4D interacting protein (PDE4DIP), transcript variant 1, mRNA [NM_014644]                           | NM_014644    | 9659      |
| A_33_P3323803 | 5.32E-03 | 1.42  | PDE4DIP      | phosphodiesterase 4D interacting protein (PDE4DIP), transcript variant 1, mRNA [NM_014644]                           | NM_014644    | 9659      |
| A_33_P3389649 | 2.55E-02 | 1.42  | PDE4D        | phosphodiesterase 4D, cAMP-specific (PDE4D), transcript variant 4, mRNA [NM_001197218]                               | NM_001197218 | 5144      |
| A_32_P78816   | 4.78E-02 | 1.90  | PSPH         | phosphoserine phosphatase (PSPH), mRNA [NM_004577]                                                                   | NM_004577    | 5723      |
| A_33_P3317628 | 4.43E-03 | 1.40  | PKP3         | plakophilin 3 (PKP3), mRNA [NM_007183]                                                                               | NM_007183    | 11187     |
| A_33_P3413048 | 2.60E-04 | 1.43  | PLXNA3       | plexin A3 (PLXNA3), mRNA [NM_017514]                                                                                 | NM_017514    | 55558     |
| A_33_P3253672 | 4.43E-02 | -1.46 | KCNH3        | potassium voltage-gated channel, subfamily H (eag-related), member 3 (KCNH3), mRNA [NM_012284]                       | NM_012284    | 23416     |
| A_33_P3312779 | 2.44E-02 | -1.68 | PRSS33       | protease, serine, 33 (PRSS33), mRNA [NM_152891]                                                                      | NM_152891    | 260429    |
| A_23_P203475  | 5.88E-03 | -1.46 | PRKCDBP      | protein kinase C, delta binding protein (PRKCDBP), mRNA [NM_145040]                                                  | NM_145040    | 112464    |
| A_33_P3335682 | 1.99E-02 | -1.45 | PPP1R14A     | protein phosphatase 1, regulatory (inhibitor) subunit 14A (PPP1R14A), transcript variant 1, mRNA [NM_033256]         | NM_033256    | 94274     |
| A_23_P145724  | 3.22E-03 | -1.74 | PPP1R17      | protein phosphatase 1, regulatory subunit 17 (PPP1R17), transcript variant 1, mRNA [NM_006658]                       | NM_006658    | 10842     |
| A_24_P243749  | 8.37E-03 | -1.67 | PK4          | pyruvate dehydrogenase kinase, isozyme 4 (PDK4), mRNA [NM_002612]                                                    | NM_002612    | 5166      |
| A_24_P3218814 | 1.03E-05 | 1.50  | RDH5         | retinol dehydrogenase 5 (11-cis/9-cis) (RDH5), transcript variant 2, mRNA [NM_002905]                                | NM_002905    | 5959      |
| A_23_P75310   | 2.41E-04 | -1.51 | ARHGAP22     | Rho GTPase activating protein 22 (ARHGAP22), transcript variant 3, mRNA [NM_021226]                                  | NM_021226    | 58504     |
| A_33_P3299110 | 3.51E-02 | -1.48 | ARHGAP42     | Rho GTPase activating protein 42 (ARHGAP42), mRNA [NM_152432]                                                        | NM_152432    | 143872    |
| A_33_P3387616 | 4.32E-03 | 1.43  | RHPN1        | rhophilin, Rho GTPase binding protein 1 (RHPN1), mRNA [NM_052924]                                                    | NM_052924    | 114822    |
| A_33_P3413989 | 6.12E-03 | 1.46  | SERPING1     | serpin peptidase inhibitor, clade G (C1 inhibitor), member 1 (SERPING1), transcript variant 1, mRNA [NM_000062]      | NM_000062    | 710       |
| A_33_P3382498 | 6.37E-03 | 7.57  | SIGLEC14     | sialic acid binding Ig-like lectin 14 (SIGLEC14), mRNA [NM_001098612]                                                | NM_001098612 | 100049587 |
| A_24_P274270  | 1.16E-03 | 1.42  | STAT1        | signal transducer and activator of transcription 1, 91kDa (STAT1), transcript variant beta, mRNA [NM_139266]         | NM_139266    | 6772      |
| A_33_P3248072 | 2.75E-02 | 2.10  | SIRPB1       | signal-regulatory protein beta 1 (SIRPB1), transcript variant 3, mRNA [NM_001135844]                                 | NM_001135844 | 10326     |
| A_24_P785293  | 1.33E-03 | 1.41  | SNHG1        | small nucleolar RNA host gene 1 (non-protein coding) (SNHG1), long non-coding RNA [NR_003098]                        | NR_003098    | 23642     |
| A_23_P37914   | 1.26E-02 | 1.74  | SLC5A11      | solute carrier family 5 (sodium/inositol cotransporter), member 11 (SLC5A11), transcript variant 1, mRNA [NM_052944] | NM_052944    | 115584    |
| A_23_P320113  | 2.15E-04 | -1.50 | SRXN1        | sulfiredoxin 1 (SRXN1), mRNA [NM_080725]                                                                             | NM_080725    | 140809    |
| A_23_P163697  | 1.66E-03 | -1.43 | SYT17        | synaptotagmin XVII (SYT17), mRNA [NM_016524]                                                                         | NM_016524    | 51760     |
| A_32_P231179  | 7.87E-04 | -1.47 | TEKT4        | tektin 4 (TEKT4), transcript variant 1, mRNA [NM_144705]                                                             | NM_144705    | 150483    |
| A_24_P306443  | 3.04E-02 | -1.45 | LOC100233156 | tektin 4 pseudogene (LOC100233156), transcript variant 1, non-coding RNA [NR_037871]                                 | NR_037871    | 100233156 |
| A_24_P287189  | 6.60E-03 | -1.77 | TOLLIP       | toll interacting protein (TOLLIP), mRNA [NM_019009]                                                                  | NM_019009    | 54472     |
| A_33_P3387696 | 1.79E-02 | -1.59 | TMBIM4       | transmembrane BAX inhibitor motif containing 4 (TMBIM4), transcript variant 1, mRNA [NM_001282606]                   | NM_001282606 | 51643     |
| A_33_P3411632 | 1.36E-03 | 1.47  | TMEM121      | transmembrane protein 121 (TMEM121), mRNA [NM_025268]                                                                | NM_025268    | 80757     |

|               |          |       |              |                                                                                                                                              |                   |           |
|---------------|----------|-------|--------------|----------------------------------------------------------------------------------------------------------------------------------------------|-------------------|-----------|
| A_33_P3338417 | 1.79E-02 | 1.47  | WARS2        | tryptophanyl tRNA synthetase 2, mitochondrial (WARS2), transcript variant 2, mRNA [NM_201263]                                                | NM_201263         | 10352     |
| A_23_P26386   | 5.26E-03 | -1.49 | TPPP3        | tubulin polymerization-promoting protein family member 3 (TPPP3), mRNA [NM_016140]                                                           | NM_016140         | 51673     |
| A_23_P19291   | 3.79E-03 | 3.03  | TUBB2A       | tubulin, beta 2A class IIa (TUBB2A), mRNA [NM_001069]                                                                                        | NM_001069         | 7280      |
| A_23_P254271  | 2.04E-02 | -1.40 | TUBB6        | tubulin, beta 6 class V (TUBB6), mRNA [NM_032525]                                                                                            | NM_032525         | 84617     |
| A_24_P813147  | 4.62E-02 | 1.77  | TUBB8        | tubulin, beta 8 class VIII (TUBB8), transcript variant 1, mRNA [NM_177987]                                                                   | NM_177987         | 347688    |
| A_23_P30163   | 6.95E-03 | 1.46  | FLJ13197     | uncharacterized FLJ13197 (FLJ13197), long non-coding RNA [NR_026804]                                                                         | NR_026804         | 79667     |
| A_33_P3229863 | 1.41E-02 | -1.43 | LOC100128714 | uncharacterized LOC100128714 (LOC100128714), long non-coding RNA [NR_040082]                                                                 | NR_040082         | 100128714 |
| A_33_P3409580 | 4.99E-02 | -1.69 | LOC100129722 | uncharacterized LOC100129722 (LOC100129722), long non-coding RNA [NR_038389]                                                                 | NR_038389         | 100129722 |
| A_33_P3327697 | 2.38E-03 | 1.43  | LOC145474    | uncharacterized LOC145474 (LOC145474), long non-coding RNA [NR_027046]                                                                       | NR_027046         | 145474    |
| A_32_P153071  | 1.36E-03 | 1.55  | VIPR2        | vasoactive intestinal peptide receptor 2 (VIPR2), mRNA [NM_003382]                                                                           | NM_003382         | 7434      |
| A_23_P105562  | 3.82E-03 | -1.71 | VWF          | von Willebrand factor (VWF), mRNA [NM_000552]                                                                                                | NM_000552         | 7450      |
| A_23_P42288   | 1.63E-02 | -1.44 | VWA7         | von Willebrand factor A domain containing 7 (VWA7), mRNA [NM_025258]                                                                         | NM_025258         | 80737     |
| A_32_P80245   | 8.82E-03 | 2.74  | ZFP57        | ZFP57 zinc finger protein (ZFP57), mRNA [NM_001109809]                                                                                       | NM_001109809      | 346171    |
| A_23_P131024  | 1.18E-02 | 1.41  | ZBTB32       | zinc finger and BTB domain containing 32 (ZBTB32), mRNA [NM_014383]                                                                          | NM_014383         | 27033     |
| A_33_P3424339 | 1.51E-02 | -1.41 |              | 1203217A dehydrogenase, glycerinaldehyde phosphate. [THC2554230]                                                                             |                   |           |
| A_24_P461497  | 9.40E-03 | -1.42 |              | Actin beta pseudogene (LOC100418883) on Chromosome 19 [NG_0242]                                                                              |                   |           |
| A_33_P3407049 | 1.37E-03 | 1.42  |              | BAC clone CH17-90K13 from chromosome 7                                                                                                       | AC254813          |           |
| A_33_P3362886 | 3.55E-02 | 1.44  |              | cDNA FLJ31857 fis                                                                                                                            | AK056419          |           |
| A_33_P3267118 | 7.91E-03 | 1.76  | EIF4G3       | eukaryotic translation initiation factor 4 gamma, 3 [Source:HGNC Symbol;Acc:3298] [ENST00000374933]                                          |                   | 8672      |
| A_33_P3414880 | 3.33E-07 | 1.51  |              | FMNL_HUMAN (O95466) Formin-like 1 protein (Formin-like protein) (Leukocyte formin) (CLL-associated antigen KW-13), partial (3%) [THC2502506] |                   |           |
| A_33_P3351180 | 3.34E-02 | 1.50  |              | immunoglobulin heavy constant alpha 1 [Source:HGNC Symbol;Acc:5478] [ENST00000390547]                                                        | S55735            |           |
| A_33_P3424591 | 2.01E-02 | 1.55  |              | immunoglobulin heavy constant gamma 1 (G1m marker) [Source:HGNC Symbol;Acc:5525] [ENST00000390549]                                           | BC073773          |           |
| A_33_P3263319 | 2.76E-02 | 1.60  |              | immunoglobulin heavy constant gamma 3 (G3m marker) [Source:HGNC Symbol;Acc:5527] [ENST00000390551]                                           | AY172958          |           |
| A_33_P3238820 | 3.62E-05 | -1.89 |              | LINC rna TCONS_l2_00011463                                                                                                                   | TCONS_l2_00011463 |           |
| A_33_P3387352 | 1.85E-03 | -2.43 |              | major histocompatibility complex, class I, V (pseudogene) [Source:HGNC Symbol;Acc:23482] [ENST00000411514]                                   | BC068238          |           |
| A_33_P3299796 | 9.59E-04 | 1.47  | MAN1B1       | mannosidase, alpha, class 1B, member 1 [Source:HGNC Symbol;Acc:6823] [ENST00000536349]                                                       | XM_005276366      | 11253     |
| A_33_P3326733 | 4.16E-04 | 1.41  | MTPAP        | mitochondrial poly(A) polymerase [Source:HGNC Symbol;Acc:25532] [ENST00000471055]                                                            | XR_171057         | 55149     |
| A_33_P3263538 | 1.75E-03 | 1.66  |              | nuclear paraspeckle assembly transcript 1 (non-protein coding) [Source:HGNC Symbol;Acc:30815] [ENST00000501122]                              | AF001893          |           |
| A_33_P3300495 | 3.56E-03 | 1.80  |              | plasminogen-like B1 [Source:HGNC Symbol;Acc:9072] [ENST00000409310]                                                                          | BC022294          |           |
| A_33_P3340324 | 2.19E-03 | 1.51  | LOC345051    | PREDICTED: hCG38984 (LOC345051), transcript variant X1, misc_RNA [XR_109844]                                                                 | XR_109844         | 345051    |
| A_33_P3388771 | 2.33E-02 | 4.76  | LOC101060810 | PREDICTED: zinc finger protein 98-like (LOC101060810), misc_RNA [XR_172438]                                                                  | XR_172438         | 101060810 |
| A_33_P3398143 | 1.01E-03 | -3.85 |              | Q59H50_HUMAN (Q59H50) Integrin beta chain, beta 2 variant (Fragment), partial (11%) [THC2546843]                                             |                   |           |
| A_24_P24972   | 3.94E-02 | -1.41 |              | Q724W8_HUMAN (Q724W8) Heparin-binding protein HBp15, partial (92%) [THC2549395]                                                              |                   |           |
| A_33_P3292874 | 8.34E-04 | 1.52  | ARHGEF1      | Rho guanine nucleotide exchange factor (GEF) 1 [Source:HGNC Symbol;Acc:681] [ENST00000595897]                                                | AK090448          | 9138      |
| A_33_P3351351 | 4.27E-02 | -1.41 | ARHGEF10     | Rho guanine nucleotide exchange factor (GEF) 10 [Source:HGNC Symbol;Acc:14103] [ENST00000382795]                                             | BC040474          | 9639      |
| A_33_P3259705 | 8.88E-06 | 1.55  | SIGIRR       | single immunoglobulin and toll-interleukin 1 receptor (TIR) domain [Source:HGNC Symbol;Acc:30575] [ENST000003825; XM_005253044]              |                   | 59307     |
| A_33_P3264569 | 3.07E-02 | 1.66  |              | T cell receptor beta variable 10-2 [Source:HGNC Symbol;Acc:12178] [ENST00000426318]                                                          | AB306184          |           |
| A_33_P3416347 | 1.43E-02 | 1.54  |              | T cell receptor beta variable 23-1 (non-functional) [Source:HGNC Symbol;Acc:12201] [ENST00000390396]                                         | M27390            |           |
| A_33_P3374162 | 1.58E-04 | 1.53  |              | T cell receptor beta variable 27 [Source:HGNC Symbol;Acc:12208] [ENST00000390399]                                                            | AB305921          |           |
| A_33_P3233404 | 1.55E-03 | 2.34  |              | T cell receptor beta variable 28 [Source:HGNC Symbol;Acc:12209] [ENST00000390400]                                                            | AB305916          |           |
| A_33_P3806676 | 1.22E-03 | 2.02  |              | T cell receptor beta variable 28 [Source:HGNC Symbol;Acc:12209] [ENST00000390400]                                                            | AY751906          |           |
| A_33_P3314850 | 3.33E-04 | 1.51  |              | T cell receptor beta variable 6-4 [Source:HGNC Symbol;Acc:12229] [ENST00000390360]                                                           | A25966            |           |
| A_33_P3244312 | 4.48E-02 | 1.72  |              | T cell receptor gamma variable 2 [Source:HGNC Symbol;Acc:12287] [ENST00000426402]                                                            | M27337            |           |
| A_33_P3398196 | 4.01E-02 | -1.54 | USP32        | ubiquitin specific peptidase 32 [Source:HGNC Symbol;Acc:19143] [ENST00000585720]                                                             |                   | 84669     |
| A_33_P3235831 | 1.22E-02 | -1.40 |              | Uncharacterized chromosome 10 clone RP11-351o1 [AC022022.10]                                                                                 |                   |           |
| A_33_P3280502 | 5.34E-03 | 1.45  |              | Uncharacterized LOC100505915 [AK125313.1]                                                                                                    |                   |           |
| A_33_P3303355 | 4.63E-02 | -1.51 | ZCCHC18      | zinc finger, CCHC domain containing 18 [Source:HGNC Symbol;Acc:32459] [ENST00000605835]                                                      |                   | 644353    |

**Supplementary Table 3. LS Gene List.** Probes can be identified by Agilent probe ID in cases where GenBank accession is not available.
