# Supplementary material for: Transcriptomic signatures in whole blood of patients who acquire a chronic inflammatory response syndrome (CIRS) following an exposure to the marine toxin ciguatoxin
Source: PubMed Central journal article supplement (PMC4392619; doi:10.1186/s12920-015-0089-x), 2015-04-02
Supplement: 12920_2015_89_MOESM5_ESM.pdf [file 12920_2015_89_MOESM5_ESM.pdf]

| primer name | sequence (5'-3')        | size (bp) | reference  | efficiency | R <sup>2</sup> |
|-------------|-------------------------|-----------|------------|------------|----------------|
| HYMAI-F     | GTGGAGCAAAGCTGTTGTTTAG  | 22        | this study | 0.989      | 0.9996         |
| HYMAI-R     | GCACAGGTCAGGCGATAAA     | 19        | this study |            |                |
| VWF-F       | AGCCATGTA CTCCATTGACATC | 22        | this study | 1.045      | 0.9987         |
| VWF-R       | GGCATTGAGAACCTCATGGTA   | 21        | this study |            |                |
| CD9-F       | TTCCTCTTGGTGATATTCGCCA  | 22        | PB         | 0.988      | 0.9935         |
| CD9-R       | AGTTCAACGCATAGTGGATGG   | 21        | PB         |            |                |
| CXorf65-F   | TGCTTACAGAGCTTTTGTGCC   | 21        | PB         | 0.9997     | 0.9967         |
| CXorf65-R   | GCGAGTGGACTTCTTTTTGTCT  | 22        | PB         |            |                |
| F13A1-F     | GAGCCTTCAGCACTAACCTATG  | 22        | this study | 0.987      | 0.9991         |
| F13A1-R     | CTTGGCAAATGCTGTGAGATTAC | 23        | this study |            |                |
| IL18RAP-F   | TGGGATTGAGACTGTGGTTTAG  | 22        | this study | 0.986      | 0.997          |
| IL18RAP-R   | CGGACCACTGGGAAATCTTAG   | 21        | this study |            |                |
| TCRBV28-F   | GTAGGCCTCGTAGATGTGAAAG  | 22        | this study | 0.979      | 0.9991         |
| TCRBV28-R   | GGTCCATATCCTGGACACATTC  | 22        | this study |            |                |
| *CCDC12-F   | GAAGGCCCTACGGGAGAAAAC   | 21        | PB         | 0.976      | 0.9994         |
| *CCDC12-R   | CCGAGCCTAAGTTCCTG       | 19        | PB         |            |                |

**Supplementary Table 4. Primers used in qPCR reactions.** PB: PrimerBank:

<http://pga.mgh.harvard.edu/primerbank/>. \* denotes transcript used as a reference.
