# Supplementary material for: Transcriptomic signatures in whole blood of patients who acquire a chronic inflammatory response syndrome (CIRS) following an exposure to the marine toxin ciguatoxin
Source: PubMed Central journal article supplement (PMC4392619; doi:10.1186/s12920-015-0089-x), 2015-04-02
Supplement: 12920_2015_89_MOESM7_ESM.pdf [file 12920_2015_89_MOESM7_ESM.pdf]

| Identifier  | Gender | Trained | Predicted | Confidence |
|-------------|--------|---------|-----------|------------|
| Control 1   | Female | control | [control] | 0.532      |
| Control 2   | Male   | control | [control] | 0.532      |
| Control 3   | Male   | control | [control] | 0.636      |
| Control 4   | Male   | control | [control] | 0.664      |
| Control 5   | Male   | control | [control] | 1.000      |
| Control 6*  | Male   |         | [control] | 0.247      |
| Control 7   | Female | control | [control] | 0.532      |
| Control 8   | Male   | control | [control] | 0.532      |
| Control 9   | Male   | control | [control] | 0.741      |
| Control 10* | Male   |         | [control] | 0.496      |
| Control 11  | Male   | control | [control] | 0.532      |
| Patient 1   | Male   | patient | [patient] | 0.577      |
| Patient 2   | Male   | patient | [patient] | 0.648      |
| Patient 3   | Male   | patient | [patient] | 0.874      |
| Patient 4   | Female | patient | [patient] | 0.577      |
| Patient 5*  | Male   |         | [patient] | 0.330      |
| Patient 6   | Male   | patient | [patient] | 0.577      |
| Patient 7   | Male   | patient | [patient] | 0.577      |
| Patient 8   | Male   | patient | [patient] | 0.577      |
| Patient 9   | Female | patient | [patient] | 0.577      |
| Patient 10* | Male   |         | [patient] | 0.250      |
| Patient 11  | Male   | patient | [patient] | 1.000      |

**Supplementary Table 5. SVM Classification of Averaged Technical Replicates.**

Results of predictions and confidence for cases of CIRS-ciguatera and controls using a Support Vector Machines classification algorithm on the averaged technical replicates, while withholding four data profiles\* from training.
